# Supplementary material for: Sol–gel synthesis and photoluminescent properties of LaPO4:A (A = Eu3+, Ce3+, Tb3+) nanocrystalline thin films
Source: Royal Society of Chemistry journal article supplement (doi:10.1039/b302600k), 2003-01-01
Supplement: b302600k.doc [file b302600k.doc]

# Supplementary materials

The decay curves of Tb3+ (5D4-7F5 at 543 nm) luminescence in La0.64Ce0.2Tb0.16 PO4 (a) and La0.84Tb0.16PO4 (b) films annealed at 1000oC.
